# Supplementary material for: Ribosomal protein eL24, involved in two intersubunit bridges, stimulates translation initiation and elongation
Source: Oxford University Press journal article supplement (doi:10.1093/nar/gky1083), 2018-10-19
Supplement: gky1083_supplemental_files.pdf [file gky1083_supplemental_files.pdf]

# **Ribosomal protein eL24, involved in two intersubunit bridges, stimulates translation initiation and elongation**

Ivan Kisly, Jaanus Remme, Tiina Tamm

## **SUPPLEMENTARY DATA**

## SUPPLEMENTARY FIGURES

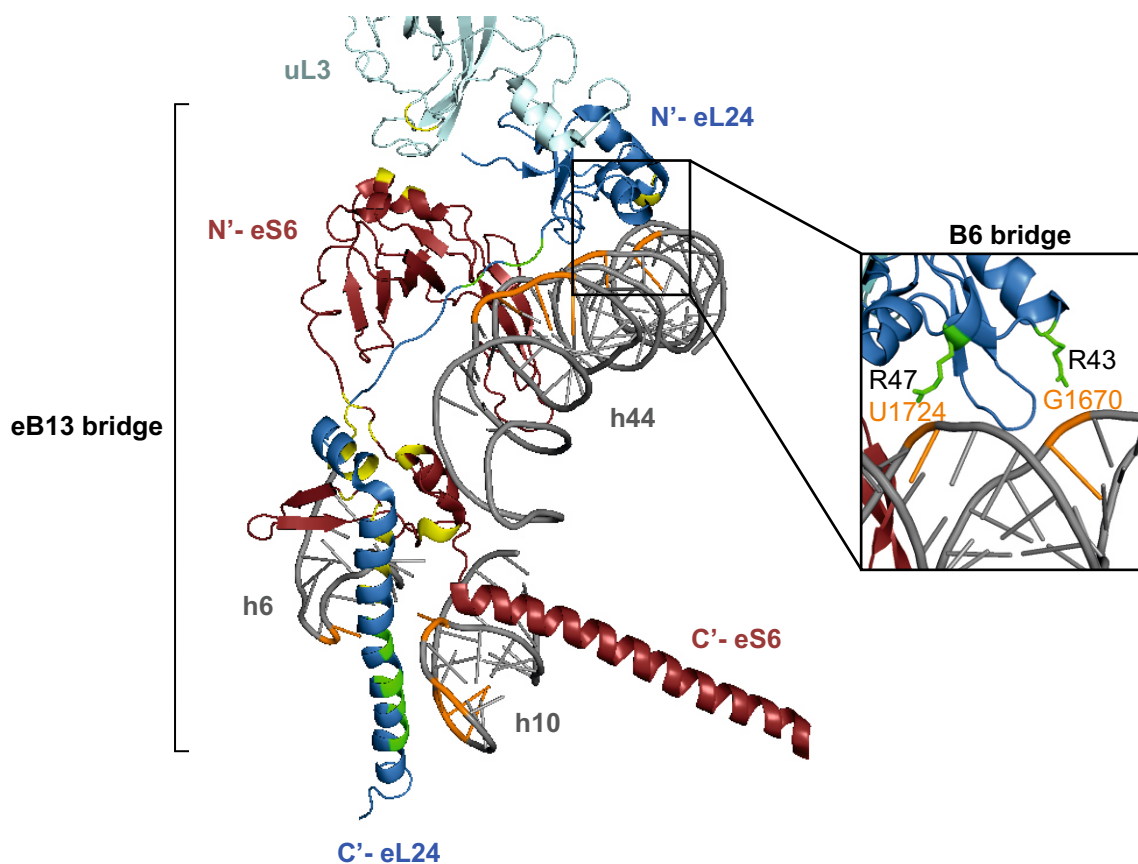

**Figure S1. Intersubunit bridges eB13 and B6 in the post-translocational state of the *S. cerevisiae* ribosome.** eL24 (blue), eS6 (red), uL3 (light cyan) and 18S rRNA h6, h10 and h44 (grey) are shown. Amino acid residues forming protein-protein and protein-rRNA type contacts are colored yellow and green, respectively. 18S rRNA nucleotides involved in protein-rRNA type contacts are colored orange. Ribosomal structures were generated by PyMol using coordinates from (1).

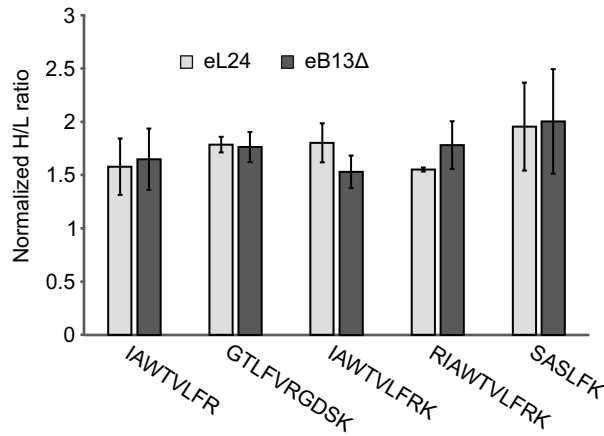

1 MKVEIDSFSG AKIYPGRGTL FVRGDSKIFR FQNSKSASLF KQRKNPRRIA WTVLFRKHHK KGITE 65  
 GTL FVRGDSK SASLF K RIA WTVLFRK  
 IA WTVLFRK  
 IA WTVLFR

**Figure S2. “Heavy”/”light” ratios of peptides originated from the N-terminal domain of eL24 in ribosomes of eB13Δ and control cells.** The average (mean ± SD) ratios across all biological replicates are plotted. Sequence of the N-terminal domain of eL24 is presented in black letters. Identified peptides are shown in red letters.

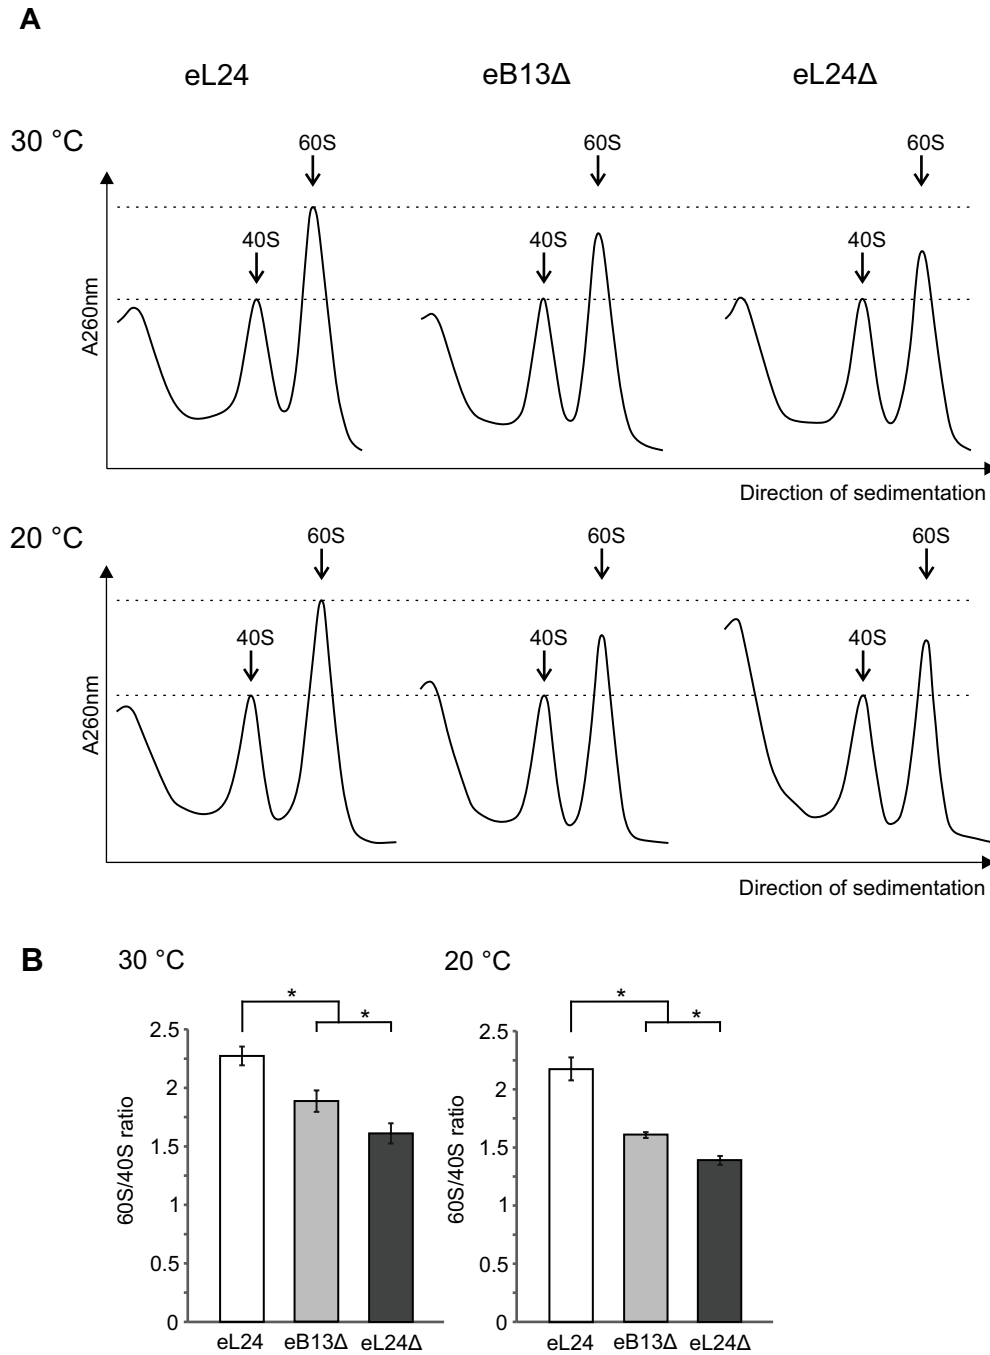

**Figure S3. Relative amounts of 60S and 40S subunits in extracts of eL24 mutants.** (A) Extracts of *rpl24AΔrpl24BΔ* strains carrying either eL24 wild-type (eL24) or mutant (eB13Δ) allele and *rpl24AΔrpl24BΔ* strain (eL24Δ, TYSC488) were analyzed by sedimentation in sucrose density gradient. Cells were grown in rich medium at 30 °C or 20 °C to mid-exponential phase. The whole cell extracts were prepared in presence of low concentration of  $Mg^{2+}$  and subjected to sedimentation analysis in 7%-47% sucrose gradients. Gradients were visualized at 260 nm (A260 nm). Sedimentation is from left to right. The peaks of 60S and 40S subunits are indicated.

(B) 60S/40S ratios of cell extracts analyzed in (A). Areas under 60S and 40S peaks were quantified by ImageJ and 60S/40S ratios were calculated. The averages (mean  $\pm$  SD) of at least three biological replicates are plotted. Statistical significance was determined by the unpaired two sample Student's t test (\*,  $p < 0.01$ ).

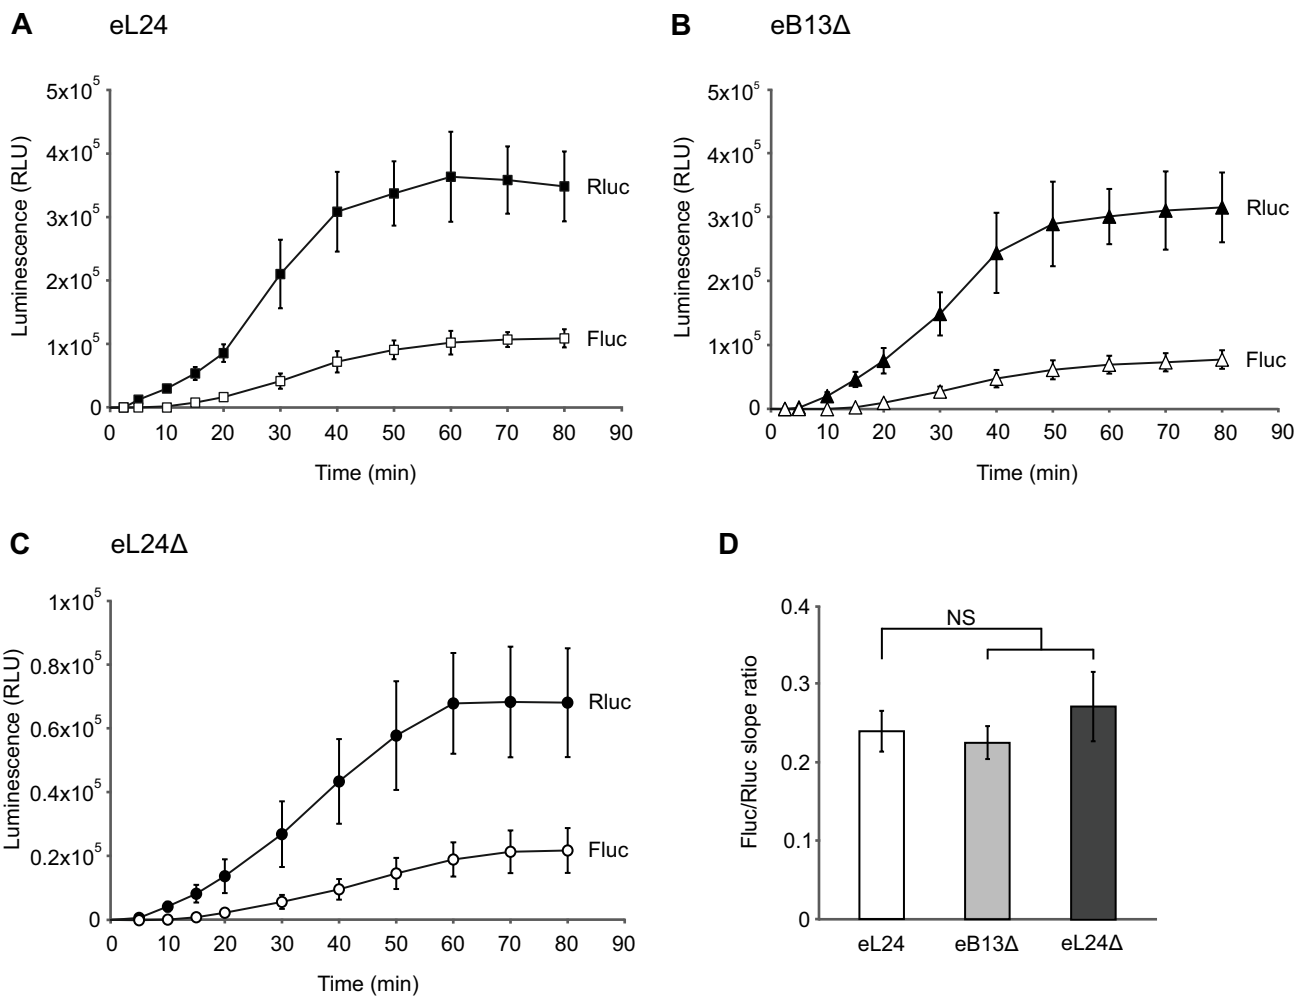

**Figure S4. Synthesis of fusion Renilla-Firefly luciferase in yeast cell-free translation extracts prepared from eL24 control cells (A), eB13Δ cells (B) or eL24Δ cells (C).** *In vitro* translation was carried out at 25 °C in 30 μl starting volume using 500 ng of mRNA as a template. For each strain at least three independent extracts were analyzed, each extract was analyzed by at least two independent reactions. The average (mean ± SD) relative light units (RLU) of all replicates are plotted. **(D)** Ratios between slopes of Firefly and Renilla luciferase activity curves from (A, B, C). The average ratios (mean ± SD) of all replicates are plotted. Statistical significance was determined by the unpaired two sample Student's t test (NS, not significant).

## SUPPLEMENTARY TABLES

**Table S1.** Yeast strains used in this study.

| Strain  | Strain name | Genotype                                                                                | Source         |
|---------|-------------|-----------------------------------------------------------------------------------------|----------------|
| TYSC309 | WT          | <i>MATa ura3-52 leu2Δ1 his3Δ200 trp1Δ36 Δarg4 Δlys1</i>                                 | Lab collection |
| TYSC310 |             | <i>MATα ura3-52 leu2Δ1 his3Δ200 trp1Δ36 Δarg4 Δlys1</i>                                 | Lab collection |
| TYSC448 |             | <i>MATa ura3-52 leu2Δ1 his3Δ200 trp1Δ36 Δarg4 Δlys1 Δrpl24A::hphMX6</i>                 | This study     |
| TYSC455 |             | <i>MATα ura3-52 leu2Δ1 his3Δ200 trp1Δ36 Δarg4 Δlys1 Δrpl24B::hphMX6</i>                 | This study     |
| TYSC488 | eL24Δ       | <i>MATa ura3-52 leu2Δ1 his3Δ200 trp1Δ36 Δarg4 Δlys1 Δrpl24A::hphMX6 Δrpl24B::hphMX6</i> | This study     |

**Table S2.** Plasmids used in this study.

| Plasmid                                      | Description                                          | Source, reference |
|----------------------------------------------|------------------------------------------------------|-------------------|
| <i>pRS314</i>                                | <i>TRP1 / CEN</i>                                    | (2)               |
| <i>pRS314-RPL24</i>                          | <i>RPL24A / TRP1 / CEN</i>                           | This study        |
| <i>pRS314-rpl24<sub>1-111</sub></i>          | <i>rpl24<sub>1-111</sub> / TRP1 / CEN</i>            | This study        |
| <i>pRS314-rpl24<sub>1-80</sub></i>           | <i>rpl24<sub>1-80</sub> / TRP1 / CEN</i>             | This study        |
| <i>pRS314-rpl24<sub>1-65</sub></i>           | <i>rpl24A<sub>1-65</sub> / TRP1 / CEN</i>            | This study        |
| <i>pRS314-rpl24(R43A,R47A)</i>               | <i>rpl24A(R43A,R47A) / TRP1 / CEN</i>                | This study        |
| <i>pRS314-rpl24<sub>1-65</sub>(R43,R47A)</i> | <i>rpl24A<sub>1-65</sub>(R43A,R47A) / TRP1 / CEN</i> | This study        |
| <i>pUC18-Fluc</i>                            | <i>pT7/PGK1 5'UTR/Fluc / poly(A)<sub>30</sub></i>    | This study        |
| <i>pUC18-Rluc-Fluc</i>                       | <i>pT7/PGK1 5'UTR/Rluc-Fluc/poly(A)<sub>30</sub></i> | This study        |

## SUPPLEMENTARY REFERENCES

1. Ben-Shem, A., Garreau de Loubresse, N., Melnikov, S., Jenner, L., Yusupova, G. and Yusupov, M. (2011) The structure of the eukaryotic ribosome at 3.0 Å resolution. *Science*, **334**, 1524-1529.
2. Sikorski, R. S. & Hieter, P. (1989). A system of shuttle vectors and yeast host strains designed for efficient manipulation of DNA in *Saccharomyces cerevisiae*. *Genetics* **122**, 19-27.
